# Supplementary material for: The non-enzymatic electrochemical detection of glucose and ammonia using ternary biopolymer based-nanocomposites
Source: Royal Society of Chemistry journal article supplement (doi:10.1039/d1nj00474c), 2021-01-01
Supplement: d1nj00474c1.pdf [file d1nj00474c1.pdf]

## Supporting Information

### Non-enzymatic electrochemical detection of glucose and ammonia using ternary bio-nanocomposites

Sayfa Bano<sup>1</sup>, Adil Shafi Ganie<sup>1</sup>, Saima Sultana<sup>1</sup>, Mohammad Zain Khan<sup>1,2\*</sup>,  
Suhail Sabir<sup>1\*</sup>

<sup>1</sup>Environmental Research Laboratory, Department of Chemistry, Aligarh  
Muslim University Aligarh 202 002, Uttar Pradesh, India

<sup>2</sup>Industrial Chemistry Research Laboratory, Department of Chemistry, Aligarh  
Muslim University Aligarh 202 002, Uttar Pradesh, India

### New Journal of Chemistry

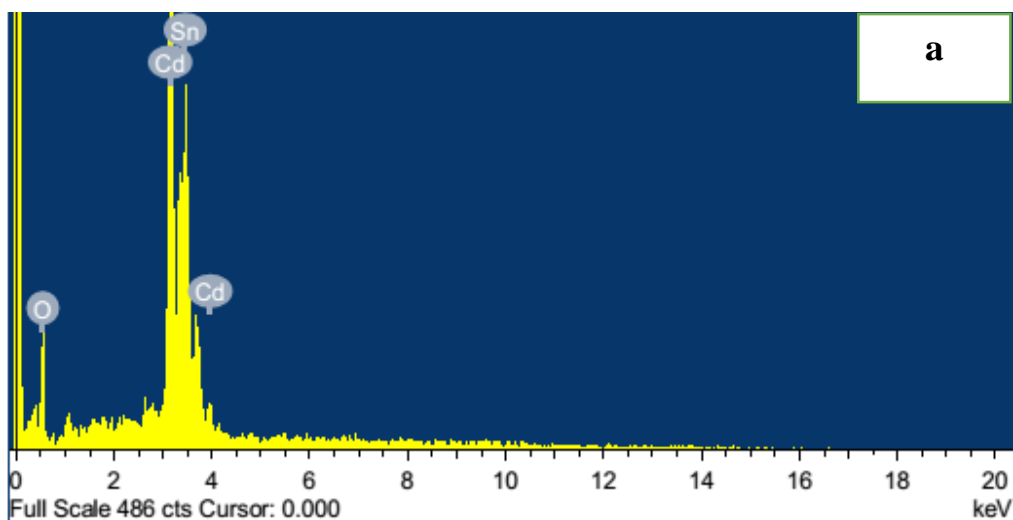

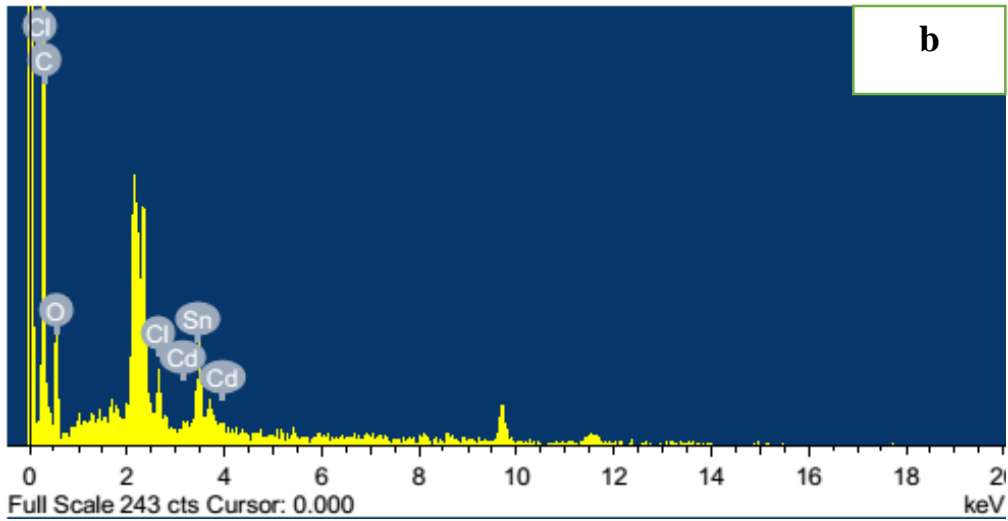

**Fig. S1.** EDAX spectra showing elemental composition of (a) CST nanoparticles (b) P/CST/Ch<sub>1</sub> bio-nanocomposites

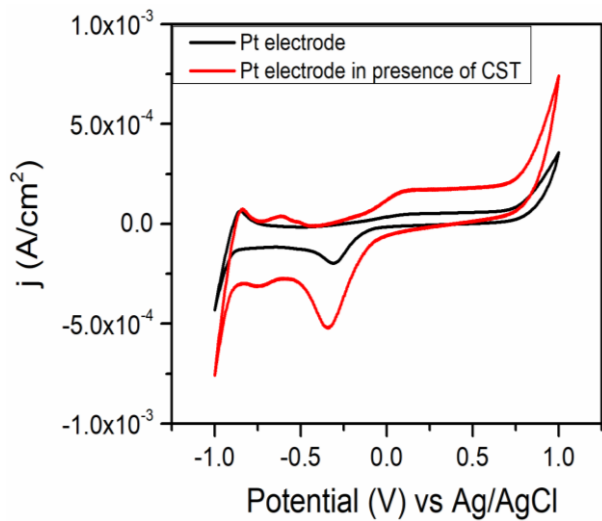

**Fig. S2.** Cyclic voltammograms of CST nanoparticles as electrocatalyst

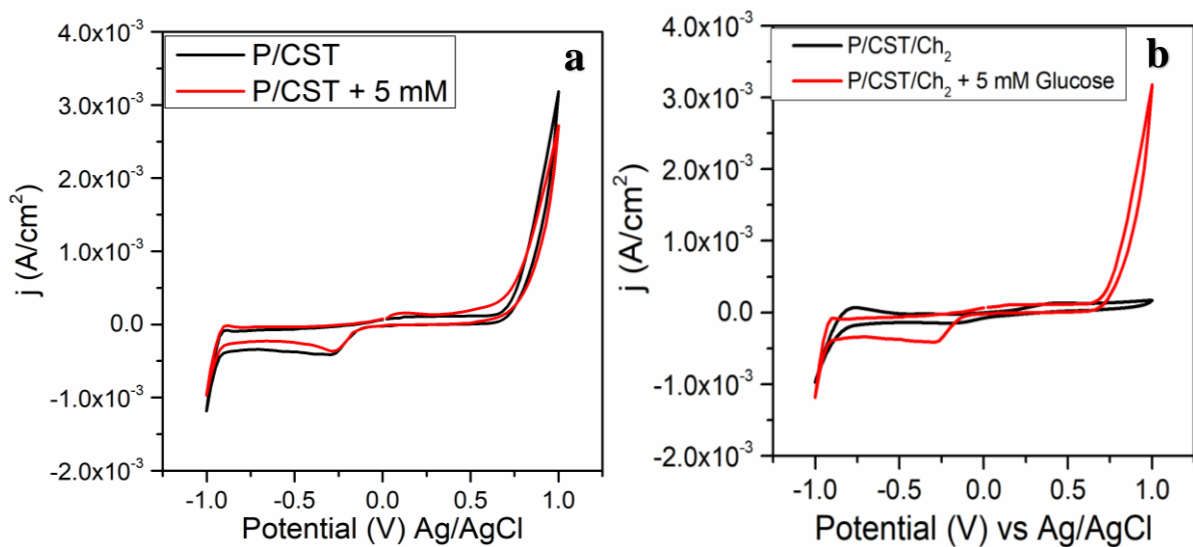

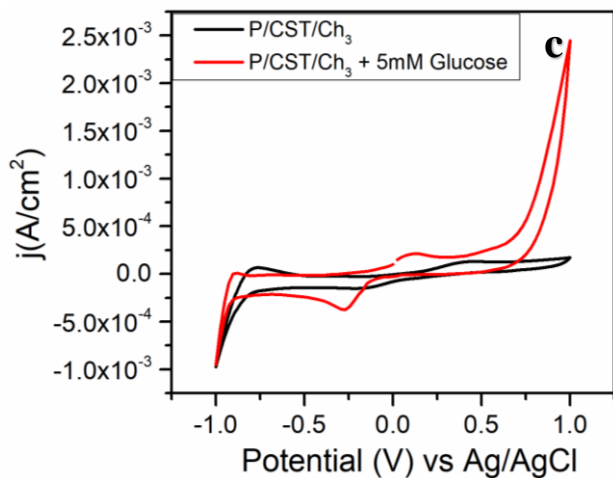

**Fig. S3.** (a, b, c) Cyclic voltammetry plot of different nanocomposites as electrocatalyst with presence and absence of glucose in 0.1 M NaOH solution

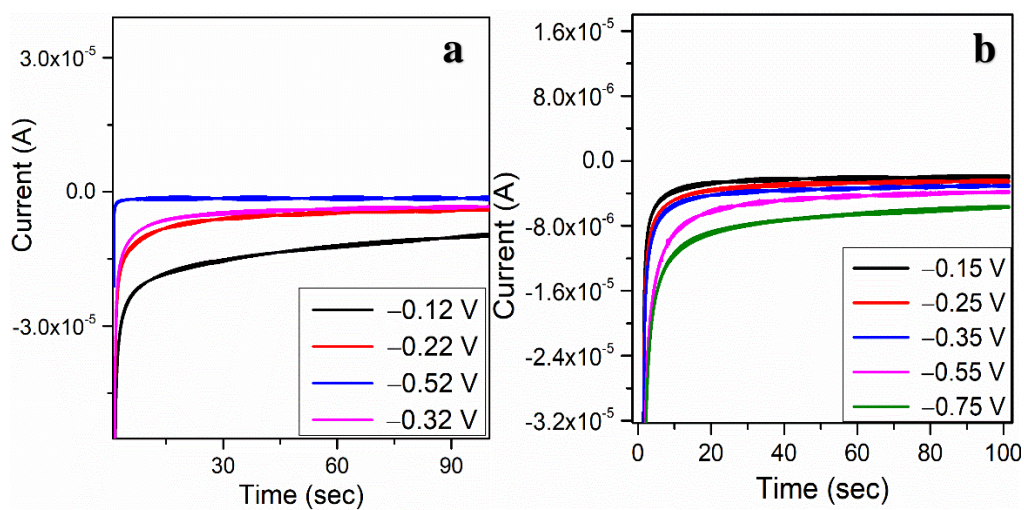

**Fig. S4.** (a) Chronoamperogram of P/CST/Ch<sub>1</sub> bio-nanocomposites as electrocatalyst at varying potential ranging from  $-0.12$  to  $-0.52$  V in presence of glucose and (b) for  $-0.15$  to  $-0.75$  V in presence of aqueous ammonia.
